# Supplementary material for: CuCo2S4nanocrystals: a new platform for multimodal imaging guided photothermal therapy
Source: Royal Society of Chemistry journal article supplement (doi:10.1039/c6nr09028a), 2017-01-01
Supplement: c6nr09028a1.pdf [file c6nr09028a1.pdf]

## Electronic Supplementary Information

### **CuCo<sub>2</sub>S<sub>4</sub> nanocrystals: A new platform for multimodal imaging guided photothermal therapy**

Xiaojuan Huang<sup>a†</sup>, Guoying Deng<sup>b†</sup>, Lijun Liao<sup>a</sup>, Wenlong Zhang<sup>a</sup>, Guoqiang Guan<sup>a</sup>, Feng Zhou<sup>b</sup>, Zhiyin Xiao<sup>a</sup>, Rujia Zou<sup>a\*</sup>, Qian Wang<sup>b\*</sup>, Junqing Hu<sup>a\*</sup>

<sup>a</sup> State Key Laboratory for Modification of Chemical Fibers and Polymer Materials, College of Materials Science and Engineering, Donghua University, Shanghai 201620, China.

<sup>b</sup> Trauma Center of Shanghai General Hospital, School of Medicine, Shanghai Jiaotong University, Shanghai 201620, China.

\* Corresponding Author.

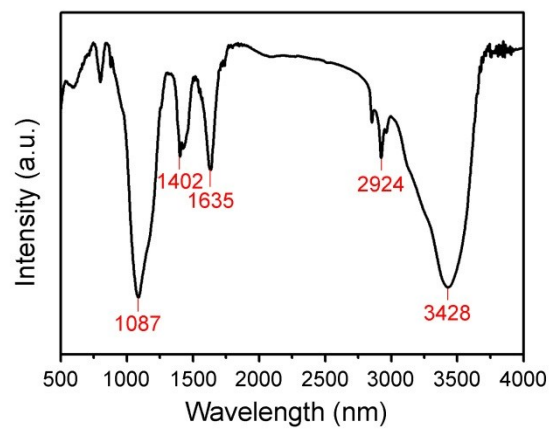

**Figure S1.** FTIR spectroscopy of CuCo<sub>2</sub>S<sub>4</sub> NCs

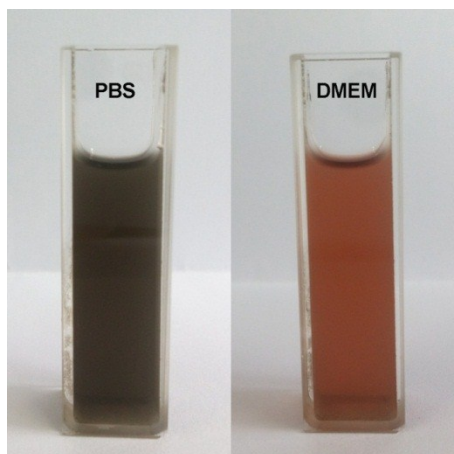

**Figure S2.** Photos of the CuCo<sub>2</sub>S<sub>4</sub> NCs dispersed in PBS and Dulbecco's Modified Eagle Medium (DMEM).

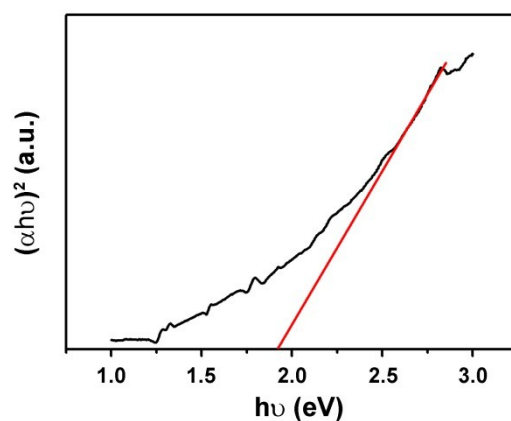

**Figure S3.** Diffuse reflection spectra of the solid  $\text{CuCo}_2\text{S}_4$  NCs.

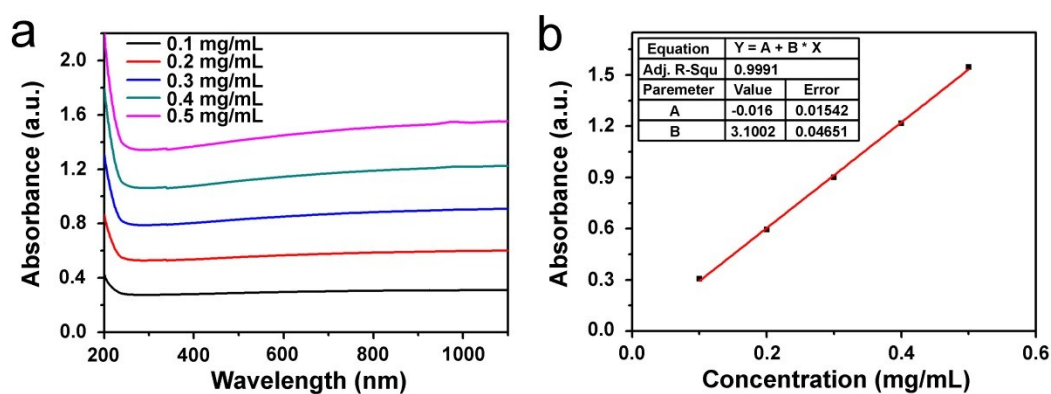

**Figure S4.** (a) UV-Vis-NIR absorption spectra of  $\text{CuCo}_2\text{S}_4$  dispersion with different concentrations. (b) Corresponding linear relationship of the absorbance at 1064 nm versus concentrations.

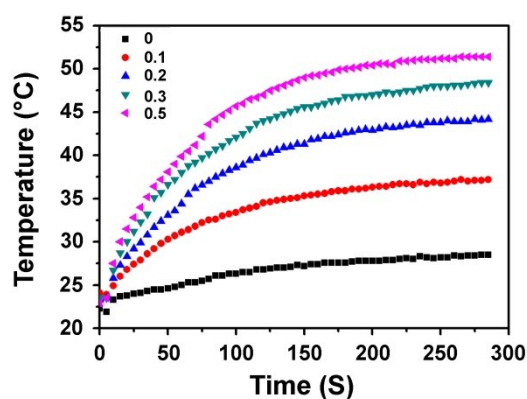

**Figure S5.** Temperature elevations of water and  $\text{CuCo}_2\text{S}_4$  dispersion with different concentrations over a period of 5 min under exposure of a NIR light (1064 nm, 0.66  $\text{W}/\text{cm}^2$ ).

**Table S1.** Blood biochemistry level of the untreated mice and experimental mice intravenously injected with  $\text{CuCo}_2\text{S}_4$  NCs (dose = 0.5 mg/animal).

|              | Control                        | Control                       | Control                        | Experiment                     | Experiment                     | Experiment                     |
|--------------|--------------------------------|-------------------------------|--------------------------------|--------------------------------|--------------------------------|--------------------------------|
| ALT          | 54.5 U/L                       | 65 U/L                        | 82.4 U/L                       | 81.6 U/L                       | 73.9 U/L                       | 68.3 U/L                       |
| AST          | 96.4 U/L                       | 175.8 U/L                     | 144.4 U/L                      | 173.8 U/L                      | 127.6 U/L                      | 151.5 U/L                      |
| $\gamma$ -GT | 0.3 U/L                        | 0.7 U/L                       | 1.3 U/L                        | 0.5 U/L                        | 0.8 U/L                        | 1 U/L                          |
| Alb          | 36.7 g/L                       | 34.5 g/L                      | 35.9 g/L                       | 33.3 g/L                       | 33.8 g/L                       | 32.5 g/L                       |
| TBA          | 34.1 $\mu\text{mol}/\text{L}$  | 15.5 $\mu\text{mol}/\text{L}$ | 21.2 $\mu\text{mol}/\text{L}$  | 24.2 $\mu\text{mol}/\text{L}$  | 25.4 $\mu\text{mol}/\text{L}$  | 85.3 $\mu\text{mol}/\text{L}$  |
| ALP          | 318.4 $\mu\text{mol}/\text{L}$ | 229 $\mu\text{mol}/\text{L}$  | 641.8 $\mu\text{mol}/\text{L}$ | 422.2 $\mu\text{mol}/\text{L}$ | 339.9 $\mu\text{mol}/\text{L}$ | 490.3 $\mu\text{mol}/\text{L}$ |
| UREA         | 4.89 mmol/L                    | 6.06 mmol/L                   | 4.99 mmol/L                    | 4.81 mmol/L                    | 4.01 mmol/L                    | 4.97 mmol/L                    |
